# Supplementary material for: Magneto-controlled flow-injection device for electrochemical immunoassay of alpha-fetoprotein on magnetic beads using redox-active ferrocene derivative polymer nanospheres
Source: Royal Society of Chemistry journal article supplement (doi:10.1039/c8an01978a), 2018-12-21
Supplement: c8an01978a1.pdf [file c8an01978a1.pdf]

## Supporting Information for:

### **Magneto-controlled flow-injection device for electrochemical immunoassay of alpha-fetoprotein on magnetic beads using redox-active ferrocene derivative polymer nanospheres**

Bin Li,<sup>a,b</sup> Wenyan Pu,<sup>a</sup> Houxi Xu,<sup>a</sup> Lilin Ge,<sup>a,\*</sup> Hang Fai Kwok<sup>b,\*</sup> and Lihong Hu<sup>a</sup>

---

<sup>a</sup> Jiangsu Key Laboratory for Functional Substance of Chinese Medicine, Nanjing University of Chinese Medicine, 138 Xianlin Avenue, Qixia district, Nanjing, 215400, China. E-mail: gelilin@njucm.edu.cn (L. Ge).

<sup>b</sup> Institute of Translational Medicine, Faculty of Health Sciences, University of Macau, Avenida de Universidade, Macau SAR. E-mail: hfwok@um.edu.mo (H. F. Kwok)

## S1. Characterization of MB-mAb<sub>1</sub>

To investigate whether mAb<sub>1</sub> antibodies were covalently conjugated onto magnetic beads, we first used UV-vis absorption spectroscopy to monitor magnetic beads before and after modification with the antibody. The UV-vis absorption spectrum of the dispersion of the present magnetic beads is shown in Fig. S1A-a. The absorption spectra of magnetic beads were complicated, and increased with the wavelength decreased in the range from 600 nm to 200 nm. However, a strong absorption characteristic peak at 278 nm was observed after the functionalized magnetic beads reacted with the antibody (Fig. S1A-b). The peak at 278 nm derived from the conjugated antibody.<sup>1</sup> Further, we also FTIR to study the bionanocomposites. As is well known, the shapes of the infrared absorption bands of amide I groups at 1610-1690 cm<sup>-1</sup> corresponding to the C=O stretching vibration of peptide linkages and amide II groups around 1500-1600 cm<sup>-1</sup> from a combination of N-H bending and C-N stretching can provide detailed information on the secondary structure of proteins.<sup>2</sup> After interaction of mAb<sub>1</sub> with magnetic bead, the FTIR spectra of the functionalized magnetic beads displayed two absorption peaks at 1673 and 1561 cm<sup>-1</sup> (Fig. S1B-b), which corresponded to the amide I and II groups of the antibodies. The weak bands occurred in the region of 1200-1400 cm<sup>-1</sup> were assigned to the wagging and twisting vibrations of the -CH<sub>2</sub> group in these proteins and were commonly referred to as the progression bands.<sup>3</sup> These results also revealed that mAb<sub>1</sub> antibody was covalently conjugated onto magnetic beads.

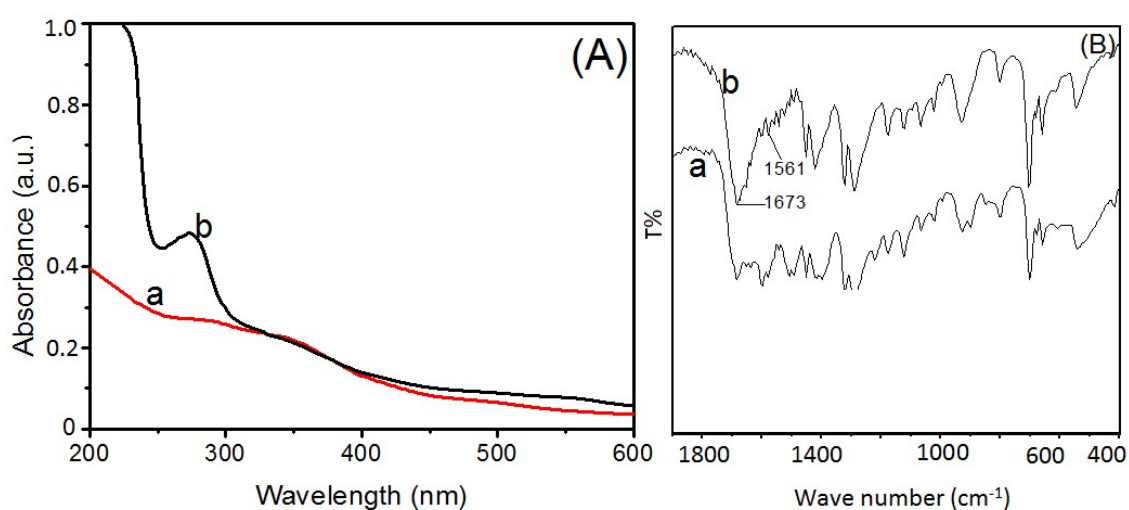

**Fig. S1** (A) UV-vis absorption spectra and (B) FTIR spectra of magnetic beads (a) before and (b) after reaction with mAb<sub>1</sub> antibody.

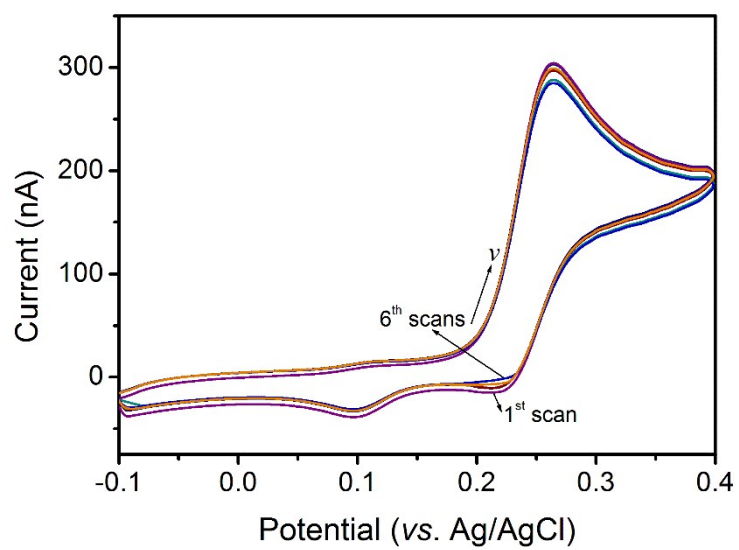

**Fig. S2** Cyclic voltammograms of FDNP-mAb<sub>2</sub>/AFP/MB-mAb<sub>1</sub>/ITO during the continuous scans in PBS (10 mM, pH 7.0) at 50 mV s<sup>-1</sup>.

## References

1. D. Tang, R. Yuan and Y. Chai, *J. Phys. Chem. B*, 2006, **110**, 11640-11646.
2. M. Jackson, L. Choo and P. Watson, *Biochim. Biophys. Acta*, 1995, **1270**, 1-6.
3. C. Feng, Y. Xu and L. Song, *Sens. Actuators B*, 2000, **66**, 190-192.
